# Supplementary material for: Complete Mitochondrial Genome of Two Ectoparasitic Capsalids (Platyhelminthes: Monogenea: Monopisthocotylea): Gene Content, Composition, and Rearrangement
Source: MDPI journal article supplement (doi:10.3390/genes13081376), 2022-08-01
Supplement: s1 [file s1]

**Table S1.** A+T content based on 13 mitogenomic elements of the 26 selected monogeneans.

| Species                  | atp6 | cox1 | cox2 | cox3 | cytb | nad1 | nad2 | nad3 | nad4 | nad4L | nad5 | nad6 | rRNAs (+) | tRNAs(+) |
|--------------------------|------|------|------|------|------|------|------|------|------|-------|------|------|-----------|----------|
| <i>B. seriolae</i>       | 74.7 | 70.3 | 69.2 | 76.4 | 70.9 | 73.8 | 79.8 | 78.4 | 80.5 | 78.5  | 77.1 | 80.6 | 75.3      | 75.4     |
| <i>B. hoshinai</i>       | 71.4 | 70.0 | 68.7 | 75.3 | 70.1 | 70.5 | 79.1 | 79.1 | 78.2 | 69.8  | 75.4 | 78.2 | 73.3      | 74.8     |
| <i>C. katsuwoni</i>      | 66.7 | 63.7 | 64.3 | 67.7 | 63.6 | 63.7 | 70.7 | 69.2 | 68.1 | 69.9  | 68.8 | 67.8 | 66.9      | 64.8     |
| <i>C. martinieri</i>     | 60.8 | 59.6 | 61.3 | 63.9 | 62.9 | 63.7 | 64.8 | 68.1 | 63.5 | 66.3  | 64.2 | 66.5 | 66.2      | 63.5     |
| <i>C. pricei</i>         | 68.5 | 65.8 | 66.5 | 67.3 | 66.1 | 67.7 | 71.5 | 73.2 | 69.9 | 72.3  | 70.6 | 72.0 | 66.2      | 67.5     |
| <i>C. sclerosus</i>      | 61.8 | 63.5 | 62.5 | 64.0 | 63.1 | 67.6 | 63.7 | 65.5 | 63.2 | 65.1  | 64.7 | 65.2 | 62.6      | 63.8     |
| <i>C. halli</i>          | 61.5 | 62.3 | 60.4 | 62.3 | 62.3 | 63.6 | 63.8 | 65.8 | 62.9 | 66.7  | 62.4 | N/A  | 65.3      | 63.5     |
| <i>D. lamellatus</i>     | 67.6 | 67.0 | 63.4 | 66.4 | 68.0 | 68.3 | 70.1 | 71.0 | 69.8 | 71.9  | 71.5 | 74.5 | 68.3      | 68.2     |
| <i>E. malmbergi</i>      | 67.3 | 66.4 | 65.0 | 66.0 | 66.6 | 69.0 | 69.1 | 69.9 | 67.6 | 69.4  | 69.2 | 72.5 | 67.9      | 71.3     |
| <i>G. brachymystacis</i> | 64.7 | 62.7 | 66.2 | 66.5 | 62.5 | 67.6 | 67.1 | 66.3 | 63.4 | 67.9  | 63.1 | 69.6 | 69.1      | 68.6     |
| <i>G. gurleyi</i>        | 73.1 | 69.6 | 69.9 | 72.5 | 67.7 | 71.4 | 77.6 | 72.8 | 73.3 | 75.5  | 71.1 | 76.0 | 73.3      | 72.5     |
| <i>G. nyanzae</i>        | 78.9 | 73.6 | 76.6 | 79.1 | 75.7 | 78.7 | 86.5 | 82.4 | 82.2 | 81.4  | 81.6 | 83.5 | 78.5      | 77.7     |
| <i>G. salaris</i>        | 60.6 | 58.3 | 62.7 | 61.3 | 59.7 | 59.7 | 62.5 | 60.4 | 60.3 | 67.9  | 58.8 | 67.0 | 67.0      | 68.1     |
| <i>G. derjavinoides</i>  | 70.2 | 65.1 | 66.2 | 68.0 | 63.9 | 68.6 | 71.0 | 70.4 | 67.5 | 74.3  | 66.8 | 73.5 | 70.0      | 69.9     |
| <i>G. kobayashii</i>     | 73.7 | 68.3 | 69.9 | 72.0 | 67.0 | 72.2 | 75.1 | 73.0 | 72.7 | 77.5  | 71.8 | 76.8 | 73.0      | 72.5     |
| <i>G. parvae</i>         | 71.6 | 69.8 | 72.2 | 74.6 | 70.0 | 72.8 | 80.0 | 75.2 | 75.6 | 77.1  | 74.6 | 77.4 | 74.5      | 73.2     |
| <i>L. spari</i>          | 75.5 | 70.9 | 69.6 | 75.7 | 71.1 | 74.0 | 79.3 | 78.9 | 75.4 | 73.7  | 76.1 | 78.8 | 73.8      | 74.6     |
| <i>N. melleni</i>        | 72.3 | 71.4 | 72.2 | 77.4 | 71.0 | 75.2 | 79.3 | 82.2 | 79.0 | 81.1  | 80.0 | 80.4 | 75.1      | 73.7     |
| <i>P. variegatus</i>     | 78.8 | 71.0 | 72.0 | 75.9 | 71.9 | 74.0 | 82.9 | 78.9 | 76.6 | 77.6  | 77.1 | 80.5 | 75.1      | 73.4     |
| <i>P. inermis</i>        | 81.2 | 75.1 | 76.9 | 83.1 | 77.6 | 80.9 | 87.9 | 88.1 | 83.8 | 85.4  | 85.8 | 87   | 81.3      | 82.6     |
| <i>P. yangjiangensis</i> | 75.5 | 69.8 | 70.7 | 75.0 | 70.9 | 74.1 | 77.0 | 77.7 | 74.4 | 78.9  | 76.2 | 76.7 | 76.9      | 76.2     |
| <i>S. longicornis</i>    | 65.8 | 63.4 | 64.8 | 65.5 | 65.9 | 63.8 | 68.9 | 68.7 | 65.2 | 69.0  | 66.1 | 70.2 | 62.7      | 63.2     |
| <i>T. nebulosi</i>       | 64.7 | 63.8 | 63.8 | 65.9 | 64.6 | 66.7 | 65.5 | 67.0 | 63.3 | 68.3  | 65.9 | 66.2 | 66.6      | 65.5     |
| <i>T. varicus</i>        | 76.0 | 70.6 | 70.9 | 76.1 | 74.0 | 76.9 | 81.1 | 79.1 | 79.6 | 82.2  | 77.5 | 79.6 | 76.5      | 76.5     |

|                      |      |      |      |      |      |      |      |      |      |      |      |      |      |      |
|----------------------|------|------|------|------|------|------|------|------|------|------|------|------|------|------|
| <i>T. asoti</i>      | 77.8 | 70.1 | 70.6 | 74.8 | 72.9 | 75.8 | 79.8 | 80.5 | 77.3 | 79.8 | 77.1 | 77.9 | 75.6 | 76.8 |
| <i>T. monenteron</i> | 72.1 | 69.7 | 68.8 | 72.8 | 71.7 | 72.8 | 76.2 | 77.4 | 72.9 | 73.9 | 73.9 | 75.5 | 71.0 | 71.8 |



|                          |        |        |                |            |            |        |        |        |        |        |        |        |        |        |
|--------------------------|--------|--------|----------------|------------|------------|--------|--------|--------|--------|--------|--------|--------|--------|--------|
| <i>G. brachymystacis</i> | −0.181 | −0.174 | −<br>0.096     | −<br>0.111 | −<br>0.088 | −0.187 | −0.117 | −0.167 | −0.1   | −0.148 | −0.078 | −0.089 | −0.004 | −0.008 |
| <i>G. gurleyi</i>        | −0.301 | −0.313 | −<br>0.184     | −<br>0.266 | −0.23      | −0.315 | −0.245 | −0.344 | −0.228 | −0.277 | −0.226 | −0.215 | −0.077 | −0.076 |
| <i>G. nyanzae</i>        | −0.328 | −0.254 | −<br>0.256     | −<br>0.277 | −<br>0.255 | −0.31  | −0.242 | −0.26  | −0.214 | −0.219 | −0.224 | −0.281 | −0.057 | −0.086 |
| <i>G. salaris</i>        | −0.119 | −0.109 | −<br>0.063     | −<br>0.097 | −<br>0.083 | −0.166 | −0.069 | −0.16  | −0.071 | −0.16  | −0.058 | −0.086 | 0.01   | −0.026 |
| <i>G. derjavinoides</i>  | −0.122 | −0.094 | −<br>0.075     | −<br>0.041 | −<br>0.048 | −0.09  | −0.067 | −0.122 | −0.037 | −0.135 | −0.029 | −0.076 | 0.001  | −0.01  |
| <i>G. kobayashii</i>     | −0.296 | −0.25  | −0.17<br>0.226 | −<br>0.216 | −          | −0.257 | −0.276 | −0.323 | −0.205 | −0.223 | −0.208 | −0.213 | −0.054 | −0.076 |
| <i>G. parvae</i>         | −0.221 | −0.22  | −<br>0.152     | −<br>0.203 | −<br>0.157 | −0.245 | −0.137 | −0.288 | −0.149 | −0.229 | −0.131 | −0.155 | −0.055 | −0.046 |
| <i>L. spari</i>          | −0.375 | −0.286 | −<br>0.249     | −<br>0.331 | −0.3       | −0.295 | −0.281 | −0.162 | −0.292 | −0.298 | −0.242 | −0.243 | −0.073 | −0.083 |
| <i>N. melleni</i>        | −0.251 | −0.246 | −              | −          | −          | −0.301 | −0.205 | −0.21  | −0.233 | −0.228 | −0.2   | −0.261 | −0.057 | −0.078 |



**Table S3.** Amino acid composition and relative synonymous codon usage of *Capsala katsuwoni*.

| Codon  | Count | RSCU |
|--------|-------|------|--------|-------|------|--------|-------|------|--------|-------|------|
| UUU(F) | 275   | 1.57 | UCU(S) | 75    | 2.01 | UAU(Y) | 163   | 1.48 | UGU(C) | 71    | 1.39 |
| UUC(F) | 75    | 0.43 | UCC(S) | 35    | 0.94 | UAC(Y) | 58    | 0.52 | UGC(C) | 31    | 0.61 |
| UUA(L) | 181   | 2.19 | UCA(S) | 40    | 1.07 | UAA(*) | 65    | 1.04 | UGA(W) | 49    | 0.84 |
| UUG(L) | 89    | 1.07 | UCG(S) | 11    | 0.3  | UAG(*) | 60    | 0.96 | UGG(W) | 68    | 1.16 |
| CUU(L) | 100   | 1.21 | CCU(P) | 50    | 2.02 | CAU(H) | 33    | 0.99 | CGU(R) | 12    | 1.55 |
| CUC(L) | 28    | 0.34 | CCC(P) | 23    | 0.93 | CAC(H) | 34    | 1.01 | CGC(R) | 8     | 1.03 |
| CUA(L) | 58    | 0.7  | CCA(P) | 19    | 0.77 | CAA(Q) | 29    | 1.29 | CGA(R) | 2     | 0.26 |
| CUG(L) | 41    | 0.49 | CCG(P) | 7     | 0.28 | CAG(Q) | 16    | 0.71 | CGG(R) | 9     | 1.16 |
| AUU(I) | 104   | 1.49 | ACU(T) | 60    | 1.78 | AAU(N) | 44    | 1.31 | AGU(S) | 53    | 1.42 |
| AUC(I) | 36    | 0.51 | ACC(T) | 18    | 0.53 | AAC(N) | 23    | 0.69 | AGC(S) | 20    | 0.54 |
| AUA(M) | 107   | 1.25 | ACA(T) | 47    | 1.39 | AAA(K) | 61    | 1.26 | AGA(S) | 29    | 0.78 |
| AUG(M) | 64    | 0.75 | ACG(T) | 10    | 0.3  | AAG(K) | 36    | 0.74 | AGG(S) | 35    | 0.94 |
| GUU(V) | 127   | 1.67 | GCU(A) | 51    | 1.98 | GAU(D) | 58    | 1.57 | GGU(G) | 90    | 2.18 |
| GUC(V) | 29    | 0.38 | GCC(A) | 19    | 0.74 | GAC(D) | 16    | 0.43 | GGC(G) | 15    | 0.36 |
| GUA(V) | 85    | 1.11 | GCA(A) | 19    | 0.74 | GAA(E) | 33    | 1.18 | GGA(G) | 25    | 0.61 |
| GUG(V) | 64    | 0.84 | GCG(A) | 14    | 0.54 | GAG(E) | 23    | 0.82 | GGG(G) | 35    | 0.85 |

**Table S4.** Amino acid composition and relative synonymous codon usage of *Capsala martinieri*.

| Codon  | Count | RSCU |
|--------|-------|------|--------|-------|------|--------|-------|------|--------|-------|------|
| UUU(F) | 226   | 1.41 | UCU(S) | 93    | 2.11 | UAU(Y) | 132   | 1.4  | UGU(C) | 61    | 1.23 |
| UUC(F) | 94    | 0.59 | UCC(S) | 53    | 1.2  | UAC(Y) | 57    | 0.6  | UGC(C) | 38    | 0.77 |
| UUA(L) | 129   | 1.82 | UCA(S) | 44    | 1    | UAA(*) | 73    | 1.09 | UGA(W) | 44    | 0.77 |
| UUG(L) | 70    | 0.99 | UCG(S) | 16    | 0.36 | UAG(*) | 61    | 0.91 | UGG(W) | 70    | 1.23 |
| CUU(L) | 99    | 1.39 | CCU(P) | 56    | 1.91 | CAU(H) | 35    | 1.19 | CGU(R) | 10    | 1.38 |
| CUC(L) | 35    | 0.49 | CCC(P) | 22    | 0.75 | CAC(H) | 24    | 0.81 | CGC(R) | 8     | 1.1  |
| CUA(L) | 54    | 0.76 | CCA(P) | 27    | 0.92 | CAA(Q) | 30    | 1.15 | CGA(R) | 4     | 0.55 |
| CUG(L) | 39    | 0.55 | CCG(P) | 12    | 0.41 | CAG(Q) | 22    | 0.85 | CGG(R) | 7     | 0.97 |
| AUU(I) | 72    | 1.47 | ACU(T) | 43    | 1.48 | AAU(N) | 36    | 1.18 | AGU(S) | 54    | 1.22 |
| AUC(I) | 26    | 0.53 | ACC(T) | 23    | 0.79 | AAC(N) | 25    | 0.82 | AGC(S) | 25    | 0.57 |
| AUA(M) | 97    | 1.19 | ACA(T) | 38    | 1.31 | AAA(K) | 72    | 1.4  | AGA(S) | 33    | 0.75 |
| AUG(M) | 66    | 0.81 | ACG(T) | 12    | 0.41 | AAG(K) | 31    | 0.6  | AGG(S) | 35    | 0.79 |
| GUU(V) | 88    | 1.36 | GCU(A) | 65    | 1.9  | GAU(D) | 39    | 1.13 | GGU(G) | 55    | 1.35 |
| GUC(V) | 33    | 0.51 | GCC(A) | 33    | 0.96 | GAC(D) | 30    | 0.87 | GGC(G) | 30    | 0.74 |
| GUA(V) | 88    | 1.36 | GCA(A) | 26    | 0.76 | GAA(E) | 40    | 1.13 | GGA(G) | 26    | 0.64 |
| GUG(V) | 50    | 0.77 | GCG(A) | 13    | 0.38 | GAG(E) | 31    | 0.87 | GGG(G) | 52    | 1.28 |
